# Supplementary material for: Geochemical Modeling Source Provenance, Public Health Exposure, and Evaluating Potentially Harmful Elements in Groundwater: Statistical and Human Health Risk Assessment (HHRA)
Source: MDPI journal article supplement (doi:10.3390/ijerph19116472), 2022-05-26
Supplement: s1 [file s1]

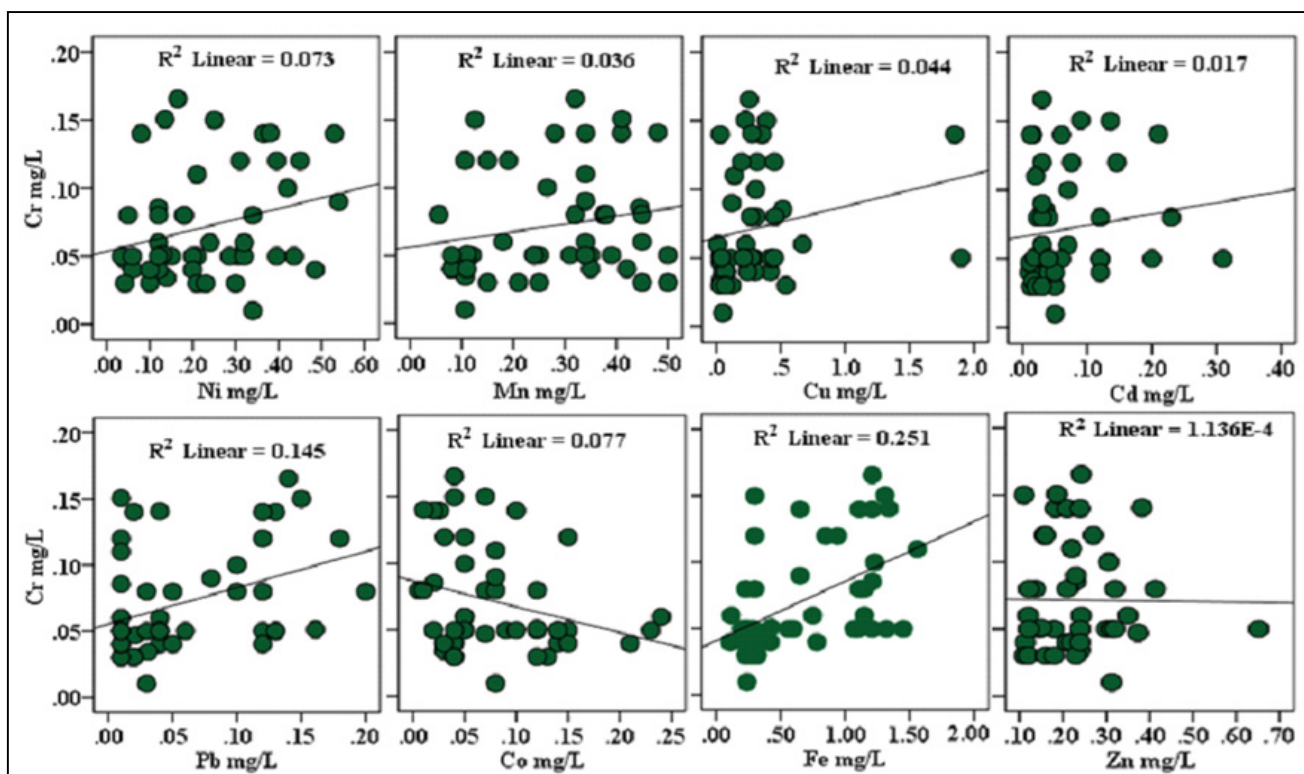

**Figure S1.** Reveals concentration profile of Cr, vs. Ni, Mn, Cu, Cd, Pb, Co, Fe, and Zn of groundwater in the Adenzai, Pakistan.

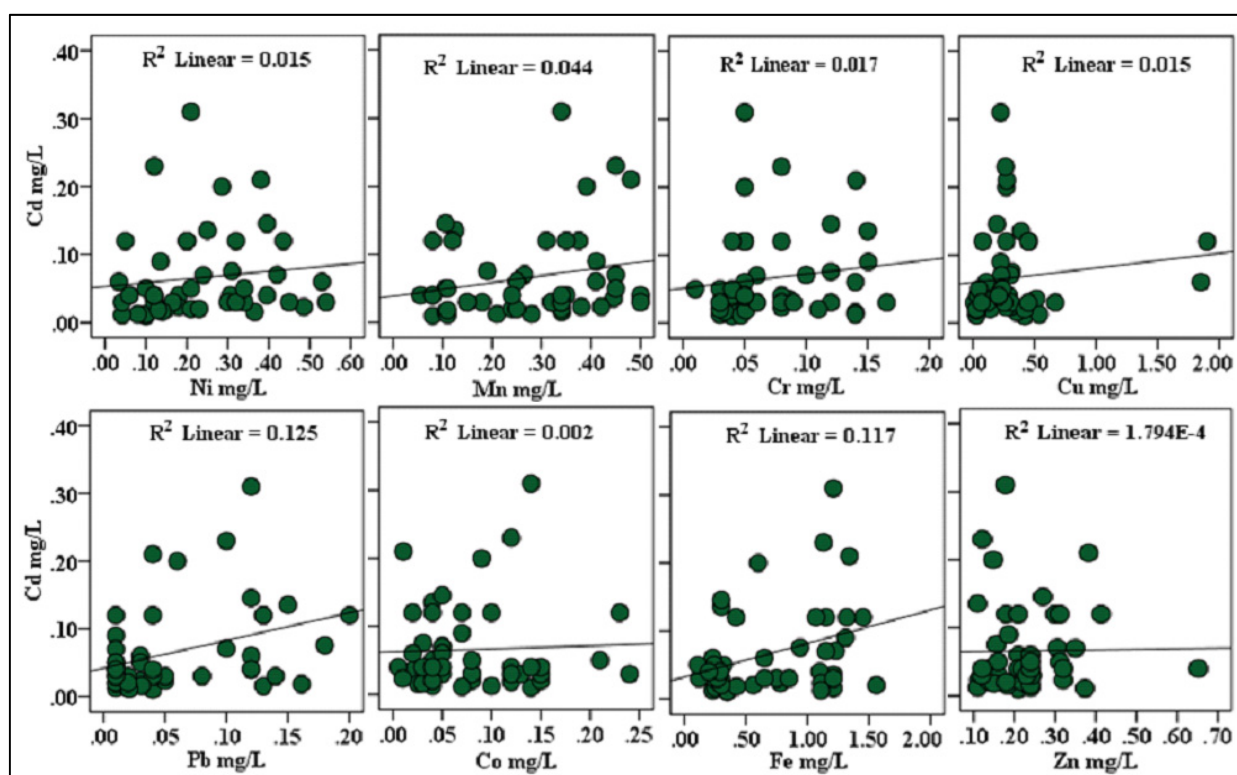

**Figure S2.** The concentrations plot of Cd vs. Ni, Mn, Cr, Cu, Pb, Co, Fe, and Zn in the groundwater Adenzai, Pakistan.

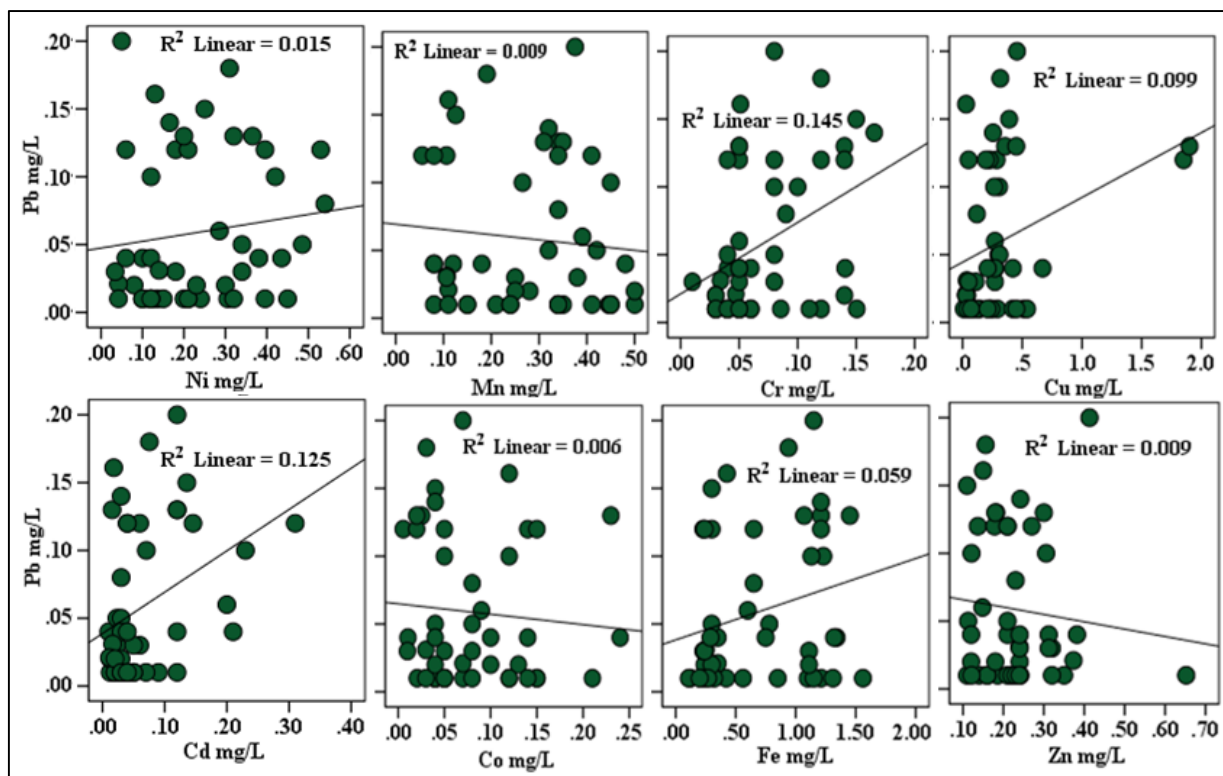

**Figure S3.** The concentration profile of Pb vs pH, Ni, Mn, Cr, Cu, Cd, Co, Fe, and Zn of groundwater in the Adenzai, Pakistan.

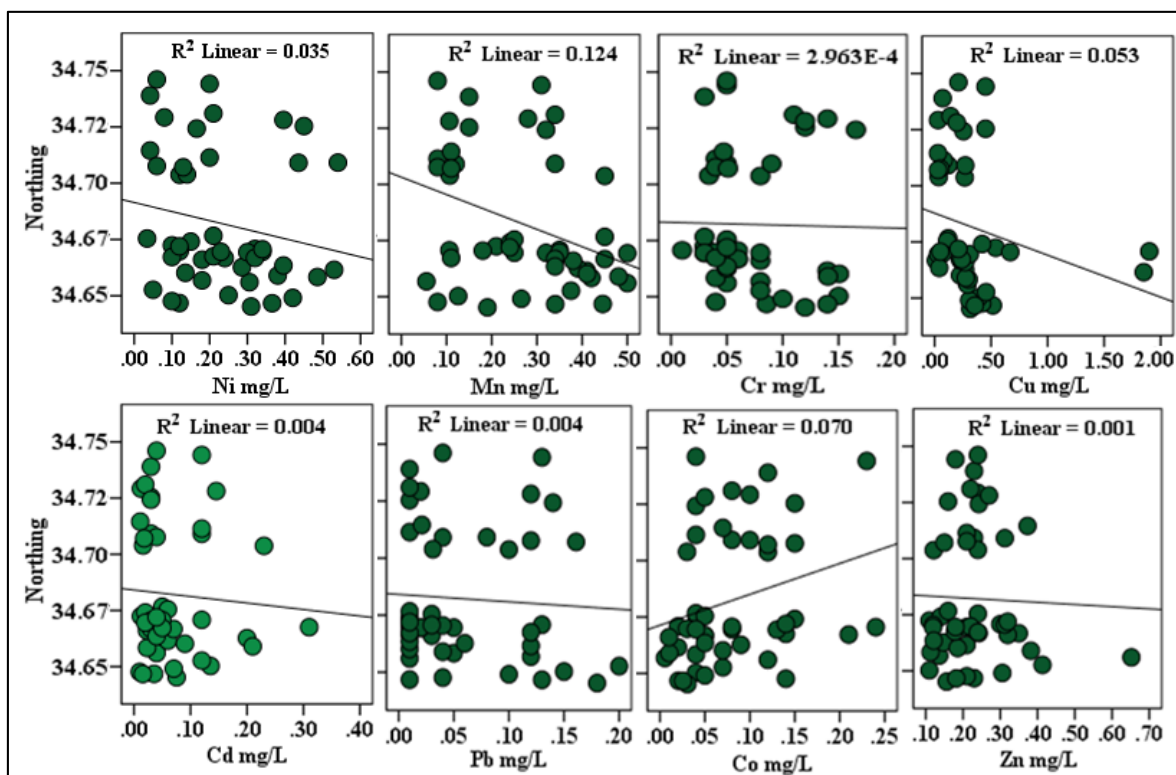

**Figure S4.** Shows northing plots against pH, Ni, Mn, Cr, Cu, Cd, Pb, Co, and Zn of groundwater in the Adenzai region, Pakistan.

**Table S1.** Pearson correlation of potentially harmful elements in groundwater of Adenzai flood plain region of Pakistan.

| Variables        | pH          | EC          | Temp        | Depth        | TDS         | Ca           | Mg           | K           | Na          | HCO <sub>3</sub> | Cl          | SO <sub>4</sub> | Ni          | Mn          | Cr          | Cu          | Cd          | Pb          | Co          | Fe          | Zn          |
|------------------|-------------|-------------|-------------|--------------|-------------|--------------|--------------|-------------|-------------|------------------|-------------|-----------------|-------------|-------------|-------------|-------------|-------------|-------------|-------------|-------------|-------------|
| pH               | <b>1.00</b> |             |             |              |             |              |              |             |             |                  |             |                 |             |             |             |             |             |             |             |             |             |
| EC               | <b>0.70</b> | <b>1.00</b> |             |              |             |              |              |             |             |                  |             |                 |             |             |             |             |             |             |             |             |             |
| Temp             | 0.40        | 0.25        | <b>1.00</b> |              |             |              |              |             |             |                  |             |                 |             |             |             |             |             |             |             |             |             |
| Depth            | -0.32       | -0.30       | -0.19       | <b>1.00</b>  |             |              |              |             |             |                  |             |                 |             |             |             |             |             |             |             |             |             |
| TDS              | <b>0.72</b> | <b>0.98</b> | 0.25        | -0.31        | <b>1.00</b> |              |              |             |             |                  |             |                 |             |             |             |             |             |             |             |             |             |
| Ca               | -0.30       | -0.47       | -0.23       | 0.49         | -0.48       | <b>1.00</b>  |              |             |             |                  |             |                 |             |             |             |             |             |             |             |             |             |
| Mg               | -0.37       | -0.56       | -0.08       | 0.36         | -0.56       | <b>0.72</b>  | <b>1.00</b>  |             |             |                  |             |                 |             |             |             |             |             |             |             |             |             |
| K                | 0.04        | -0.16       | 0.05        | -0.25        | -0.10       | -0.17        | 0.14         | <b>1.00</b> |             |                  |             |                 |             |             |             |             |             |             |             |             |             |
| Na               | <b>0.70</b> | <b>0.83</b> | 0.26        | -0.56        | <b>0.84</b> | <b>-0.71</b> | <b>-0.76</b> | 0.54        | <b>1.00</b> |                  |             |                 |             |             |             |             |             |             |             |             |             |
| HCO <sub>3</sub> | <b>0.72</b> | <b>0.81</b> | 0.24        | -0.41        | <b>0.81</b> | <b>-0.70</b> | <b>-0.72</b> | -0.10       | <b>0.91</b> | <b>1.00</b>      |             |                 |             |             |             |             |             |             |             |             |             |
| Cl               | 0.05        | -0.06       | 0.03        | -0.14        | -0.02       | -0.16        | 0.19         | 0.16        | 0.04        | -0.20            | <b>1.00</b> |                 |             |             |             |             |             |             |             |             |             |
| SO <sub>4</sub>  | <b>0.73</b> | <b>0.83</b> | 0.22        | -0.50        | <b>0.84</b> | -0.51        | -0.53        | -0.05       | <b>0.90</b> | <b>0.84</b>      | -0.09       | <b>1.00</b>     |             |             |             |             |             |             |             |             |             |
| Ni               | 0.28        | 0.34        | 0.27        | -0.28        | 0.36        | -0.07        | -0.31        | -0.21       | 0.31        | 0.33             | -0.16       | 0.35            | <b>1.00</b> |             |             |             |             |             |             |             |             |
| Mn               | 0.37        | <b>0.75</b> | 0.25        | -0.40        | <b>0.79</b> | -0.33        | -0.51        | -0.08       | <b>0.72</b> | 0.66             | -0.02       | <b>0.82</b>     | 0.50        | <b>1.00</b> |             |             |             |             |             |             |             |
| Cr               | 0.28        | <b>0.71</b> | 0.23        | -0.51        | 0.64        | -0.35        | -0.52        | -0.04       | 0.67        | 0.65             | -0.24       | 0.75            | 0.50        | <b>0.80</b> | <b>1.00</b> |             |             |             |             |             |             |
| Cu               | 0.31        | 0.41        | 0.14        | -0.49        | 0.61        | -0.29        | -0.44        | -0.20       | 0.67        | 0.63             | 0.05        | <b>0.70</b>     | 0.45        | 0.66        | 0.67        | <b>1.00</b> |             |             |             |             |             |
| Cd               | 0.41        | <b>0.79</b> | 0.36        | -0.43        | <b>0.80</b> | -0.42        | -0.55        | -0.19       | <b>0.77</b> | <b>0.72</b>      | -0.16       | <b>0.83</b>     | 0.42        | <b>0.82</b> | <b>0.78</b> | <b>0.70</b> | <b>1.00</b> |             |             |             |             |
| Pb               | 0.35        | 0.50        | 0.13        | -0.43        | <b>0.77</b> | -0.38        | -0.49        | -0.09       | <b>0.73</b> | <b>0.74</b>      | -0.18       | 0.52            | 0.45        | <b>0.84</b> | <b>0.83</b> | 0.69        | <b>0.84</b> | <b>1.00</b> |             |             |             |
| Co               | 0.20        | 0.48        | 0.08        | -0.29        | <b>0.76</b> | -0.31        | -0.48        | -0.13       | 0.65        | 0.63             | -0.06       | <b>0.74</b>     | 0.31        | <b>0.80</b> | 0.67        | 0.60        | <b>0.78</b> | <b>0.82</b> | <b>1.00</b> |             |             |
| Fe               | 0.32        | 0.45        | 0.24        | <b>-0.63</b> | 0.69        | -0.46        | -0.48        | 0.01        | <b>0.74</b> | 0.64             | -0.02       | 0.50            | 0.46        | <b>0.85</b> | 0.84        | 0.69        | <b>0.82</b> | <b>0.80</b> | <b>0.74</b> | <b>1.00</b> |             |
| Zn               | 0.35        | 0.62        | 0.28        | -0.27        | <b>0.72</b> | -0.33        | -0.51        | -0.23       | <b>0.70</b> | 0.68             | -0.13       | <b>0.76</b>     | 0.35        | <b>0.72</b> | 0.67        | 0.63        | <b>0.74</b> | 0.66        | 0.65        | <b>0.73</b> | <b>1.00</b> |

Note: Values in bold are different from 0 with a significance level alpha=0.05.

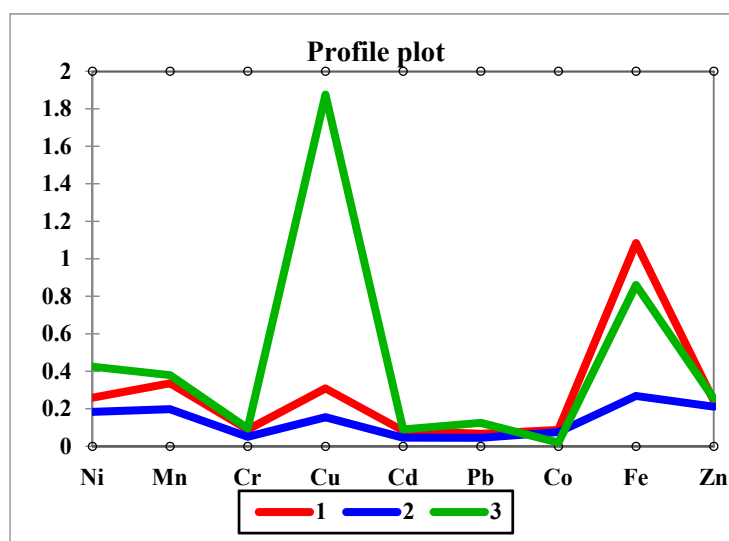

**Figure S5.** Profile plot of overall parameters of groundwater in the Adenzai, flood plain area Pakistan.

**Table S2.** Represent the pollution index of potentially harmful elements of groundwater in the Adenzai flood plain region of Pakistan.

| <b>Comp</b> | <b>Mean</b> | <b>Background Value</b> | <b>CF</b> |
|-------------|-------------|-------------------------|-----------|
| Ni          | 0.23        | 0.20                    | 1.15      |
| Mn          | 0.27        | 0.20                    | 1.35      |
| Cr          | 0.07        | 0.04                    | 1.79      |
| Cu          | 0.30        | 0.11                    | 2.80      |
| Cd          | 0.07        | 0.04                    | 1.75      |
| Pb          | 0.06        | 0.02                    | 3.36      |
| Co          | 0.12        | 0.02                    | 2.11      |
| Fe          | 0.93        | 0.3                     | 2.09      |
| Zn          | 0.23        | 0.24                    | 0.97      |
